# Supplementary material for: Highly efficient oil-fouling and foam removal achieved by surfactant mixed systems
Source: Royal Society of Chemistry journal article supplement (doi:10.1039/d3lf00145h), 2023-09-28
Supplement: d3lf00145h1.pdf [file d3lf00145h1.pdf]

## Supporting Information for Manuscript Entitled

### Highly Efficient Oil-Fouling and Foam Removal Achieved by Surfactant Mixed Systems

Zeyu Zhao,<sup>ac</sup> Tengda Wang,<sup>b</sup> Jiling Yue,<sup>a</sup> Yaxun Fan,<sup>\*a</sup> and Yilin Wang<sup>\*abc</sup>

<sup>a</sup>Beijing National Laboratory for Molecular Sciences and Institute of Chemistry, Chinese Academy of Sciences, Beijing 100190, P. R. China

<sup>b</sup>University of Science and Technology of China, Hefei 230026, P. R. China; Suzhou Institute for Advanced Research, University of Science and Technology of China, Jiangsu, 215123, P. R. China

<sup>c</sup>University of Chinese Academy of Sciences, Beijing 100049, P. R. China

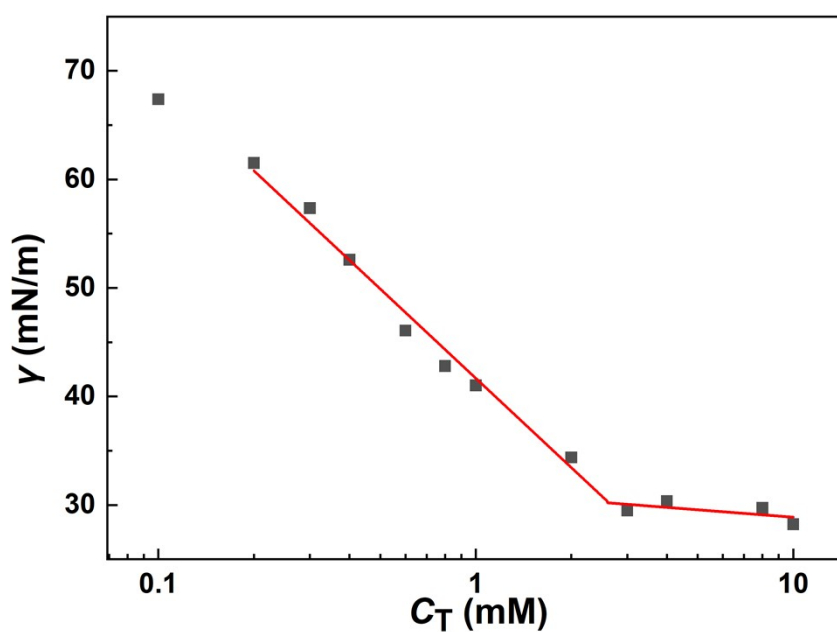

Fig. S1 Surface tension curve of dodecylamine at  $25.00 \pm 0.01$  °C.

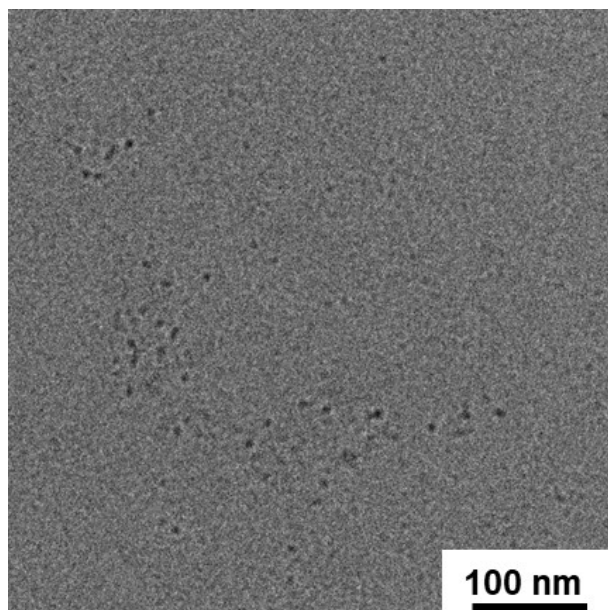

**Fig. S2** Cryo-TEM images of  $C_6N/SDS$  aggregates at  $C_T = 20$  mM and  $X_{SDS} = 0.10$ .

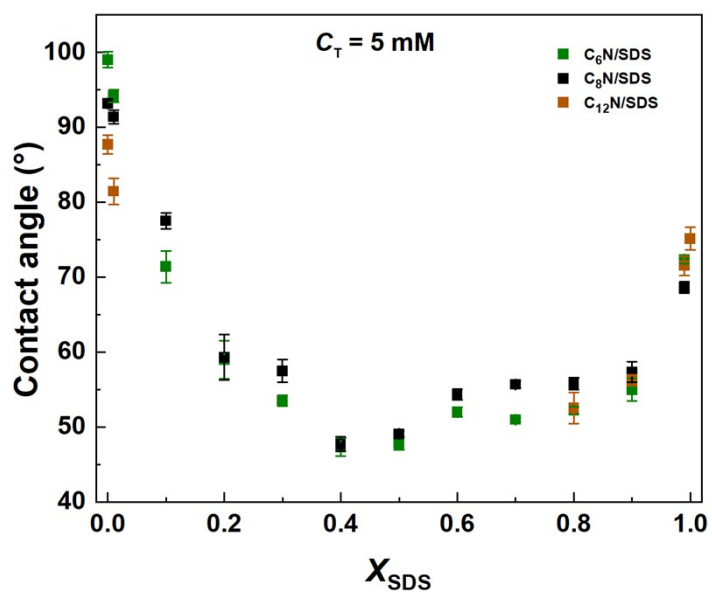

**Fig. S3** Solid/liquid contact angles of  $C_nN/SDS$  ( $n = 6, 8, 12$ ) solutions on the stainless-steel plates.

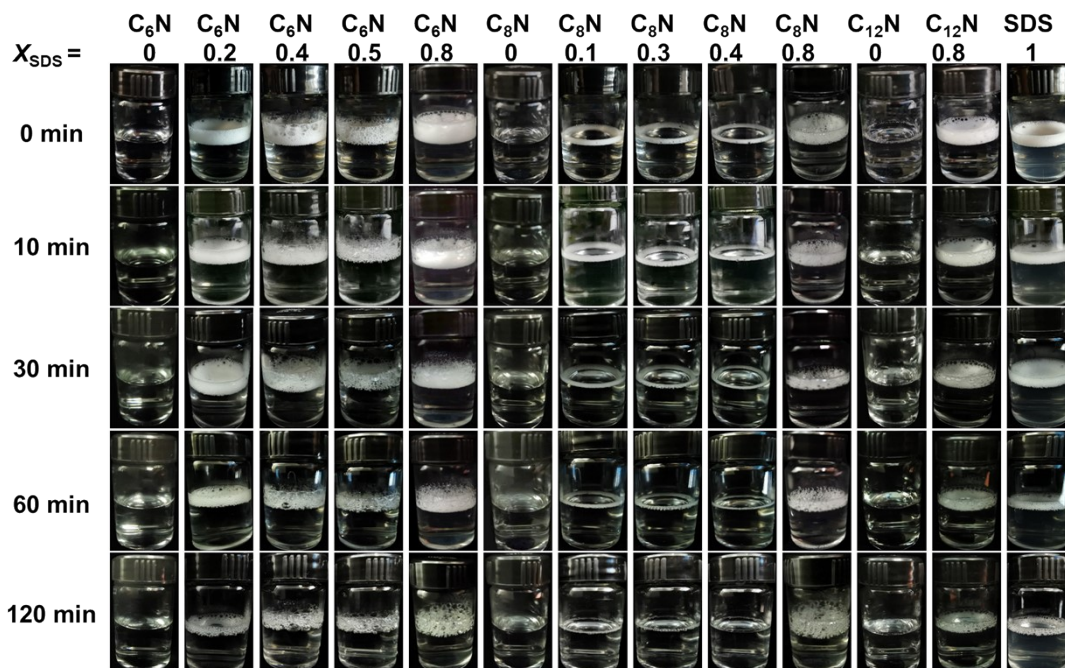

**Fig. S4** Images of foam height change against aging for  $C_n\text{N}/\text{SDS}$  at  $C_T = 5$  mM at different  $X_{\text{SDS}}$  ( $C_6\text{N}/\text{SDS}$  at  $X_{\text{SDS}} = 0, 0.20, 0.40, 0.50, 0.80$ ,  $C_8\text{N}/\text{SDS}$  at  $X_{\text{SDS}} = 0, 0.10, 0.30, 0.40, 0.80$  and  $C_{12}\text{N}/\text{SDS}$  at  $X_{\text{SDS}} = 0, 0.80, 1.00$ ) after vortex for 30 s.

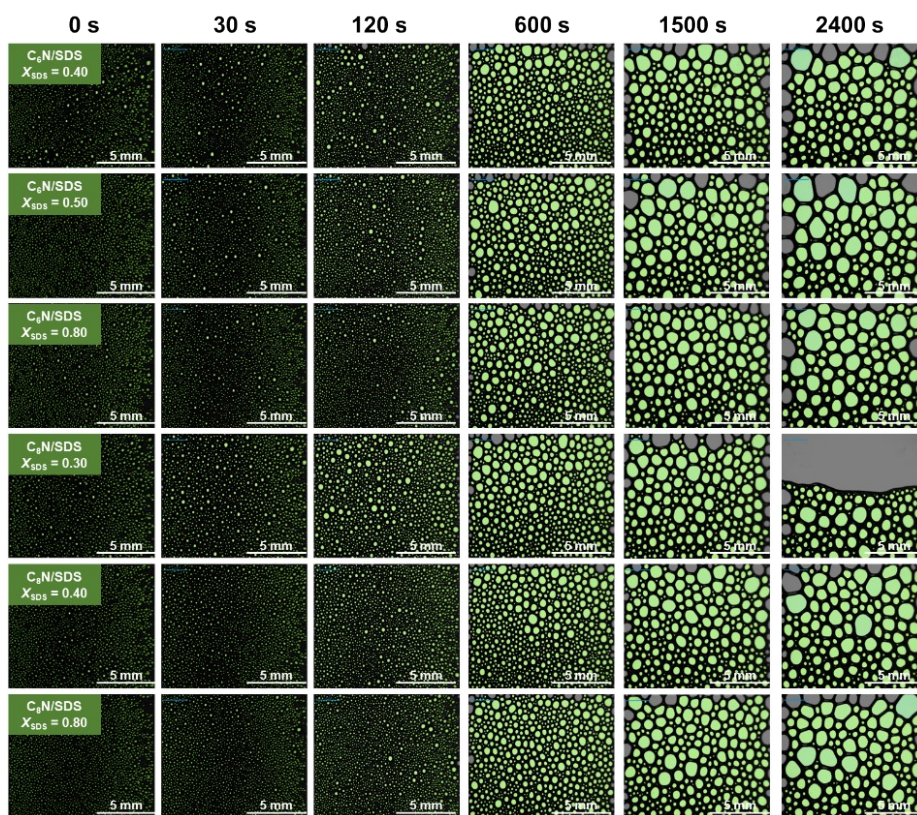

**Fig. S5** Images of foam state with aging recorded by CCD camera for 5 mM  $C_6\text{N}/\text{SDS}$  at  $X_{\text{SDS}} = 0.40$ , 5 mM  $C_6\text{N}/\text{SDS}$  at  $X_{\text{SDS}} = 0.50$ , 5 mM  $C_6\text{N}/\text{SDS}$  at  $X_{\text{SDS}} = 0.80$ , 5 mM  $C_8\text{N}/\text{SDS}$  at  $X_{\text{SDS}} = 0.30$ , 5 mM  $C_8\text{N}/\text{SDS}$  at  $X_{\text{SDS}} = 0.40$ , and 5 mM  $C_8\text{N}/\text{SDS}$  at  $X_{\text{SDS}} = 0.80$ .

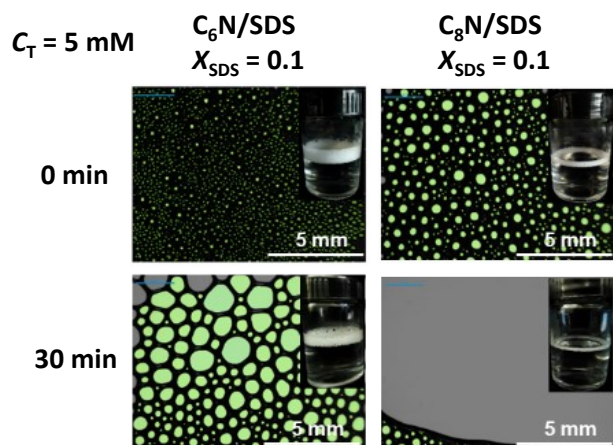

**Fig. S6** Foam state against aging for the  $C_6\text{N}/\text{SDS}$  and  $C_8\text{N}/\text{SDS}$  mixtures at fixed  $X_{\text{SDS}} = 0.10 \text{ mM}$  and  $C_T = 5.0 \text{ mM}$  with visual inspection method (inset) and air blowing method using a dynamic foam analyzer. The upper two and bottom two images correspond to 0 and 30 min.

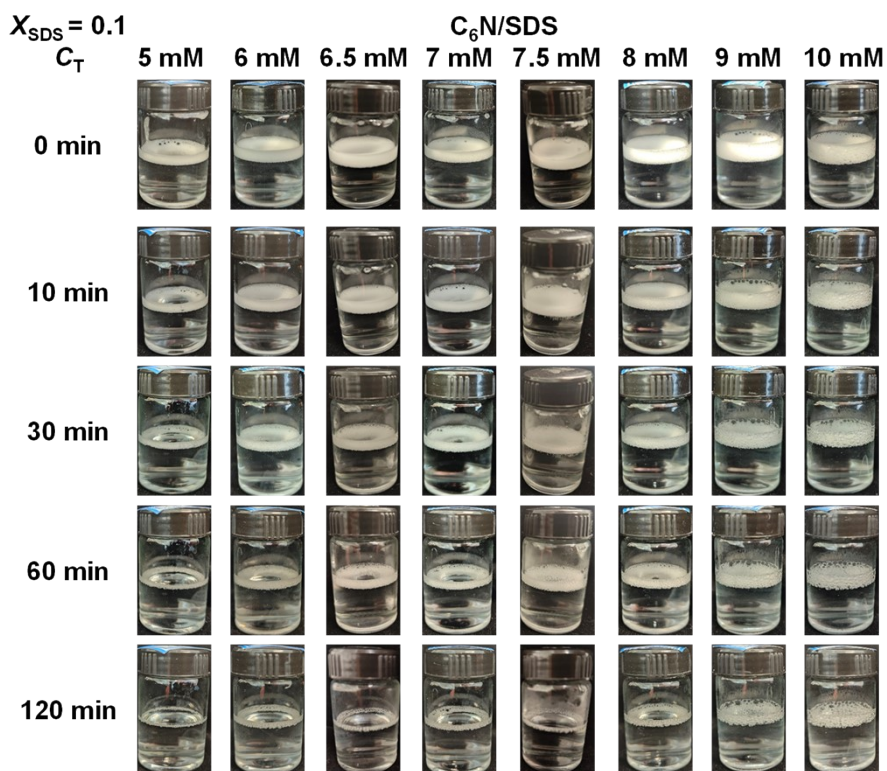

**Fig. S7** Images of foam height change against aging for  $C_6\text{N}/\text{SDS}$  at fixed  $X_{\text{SDS}} = 0.10$  and different  $C_T$  ( $C_T = 5.0, 6.0, 6.5, 7.0, 7.5, 8.0, 9.0$  and  $10.0 \text{ mM}$ ) after vortex for 30 s.

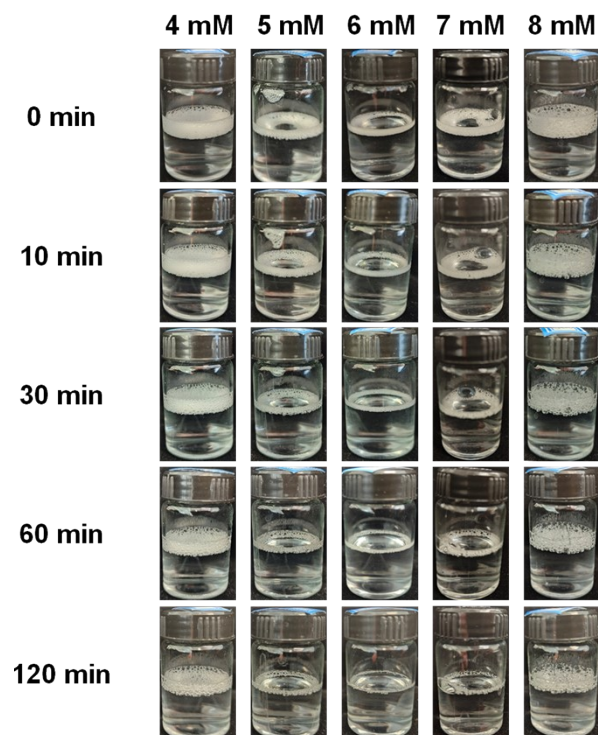

**Fig. S8** Images of foam height change against aging for  $C_8N/SDS$  at fixed  $X_{SDS} = 0.10$  and different  $C_T$  ( $C_T = 4.0, 5.0, 6.0, 7.0$  and  $8.0$  mM) after vortex for 30 s.
